# Supplementary material for: Multidisciplinary Guidelines for the Rational Use of Topical Non-Steroidal Anti-Inflammatory Drugs for Musculoskeletal Pain (2022)
Source: MDPI journal article supplement (doi:10.3390/jcm12041544), 2023-02-15
Supplement: s1 [file s1]

## Supplemental Tables and Figures

**Supplementary Table S1.** The composition and responsibilities of the guideline working groups

| Group                             | Members                                                                                                                                                                                                                     | Responsibility                                                                                                                                                                                                                                                                                                                                                                        |
|-----------------------------------|-----------------------------------------------------------------------------------------------------------------------------------------------------------------------------------------------------------------------------|---------------------------------------------------------------------------------------------------------------------------------------------------------------------------------------------------------------------------------------------------------------------------------------------------------------------------------------------------------------------------------------|
| Steering Group (6 people)         | Pharmacy (3), clinical medicine (2), guideline development methodology expert (1)                                                                                                                                           | (1) Determine the scope of the guideline; (2) Set up a guideline development group, secretary group, and external review team; (3) Preliminarily construct PICO questions; (4) Review the declaration of conflict of interest form and supervise the guideline formulation process; (5) Review and approve the recommendations and publication of this guideline.                     |
| Development group (25 people)     | Clinical pharmacy (13), evidence-based pharmacy (1), pharmacoeconomics (1), pharmaceuticals (1), orthopedic surgery (3), rheumatology and immunology (3), pain specialist (2), guideline development methodology expert (1) | (1) Determine the inclusion and ranking of clinical problems and outcome indicators; (2) Guide the secretary group to complete the survey of patient preferences and values; (3) Guide and assist the systematic review team in completing evidence retrieval and evaluation; (4) Form recommendations; (5) Complete the writing and finalization of the full text of this guideline. |
| External review team (2-3 people) | Stakeholders not directly involved in the development of this guideline, including medical workers, patients or their families, etc.                                                                                        | Review draft guidelines and make comments and suggestions.                                                                                                                                                                                                                                                                                                                            |
| Secretary Group (19 people)       | Researchers with extensive experience in guideline development                                                                                                                                                              | (1) Record the formulation process of this guideline in detail; (2) Coordinate various matters during the formulation process of this guideline.                                                                                                                                                                                                                                      |

Note: PICO (P- Patient; I- Intervention; C- Control; O- Outcome).

**Supplemental Table S2.** Clinical questions and outcomes included in this guideline

|                                                                                                                                                                                                                                                                                                                                                                                                                                                                                                                                                                                         |
|-----------------------------------------------------------------------------------------------------------------------------------------------------------------------------------------------------------------------------------------------------------------------------------------------------------------------------------------------------------------------------------------------------------------------------------------------------------------------------------------------------------------------------------------------------------------------------------------|
| 1 Clinical Question                                                                                                                                                                                                                                                                                                                                                                                                                                                                                                                                                                     |
| <i>1.1 Should patients with musculoskeletal pain use topical NSAIDs for pain relief? The following subgroups should be considered:</i> <ol style="list-style-type: none"><li>1) Acute musculoskeletal pain (including strain type, sprain type, and overuse type)</li><li>2) Chronic musculoskeletal pain (including hand arthritis, hip arthritis, knee arthritis, ankle arthritis, polyarthritis, chronic low back pain, and chronic post-traumatic limb pain)</li></ol>                                                                                                              |
| <i>1.2 What topical NSAIDs should be recommended to relieve pain in patients with musculoskeletal pain? The following subgroups should be considered:</i> <ol style="list-style-type: none"><li>1) Are there differences in the efficacy of topical NSAIDs in different dosage forms?</li><li>2) Are there differences in the efficacy of topical NSAIDs with different ingredients?</li></ol>                                                                                                                                                                                          |
| <i>1.3 Should fixed-dose or on-demand topical NSAIDs be used for patients with musculoskeletal pain?</i>                                                                                                                                                                                                                                                                                                                                                                                                                                                                                |
| <i>1.4 When patients with musculoskeletal pain use topical NSAIDs, should clinicians be concerned about drug interactions with the other drugs? The following subgroups should be considered:</i> <ol style="list-style-type: none"><li>1) oral NSAIDs</li><li>2) oral acetaminophen</li><li>3) warfarin (for the risk of bleeding and monitoring the INR value)</li><li>4) ACEI, ARB, and beta-blocker</li></ol>                                                                                                                                                                       |
| <i>1.5 Can patient populations with high risk of adverse events use topical NSAIDs? The following subgroups should be considered:</i> <ol style="list-style-type: none"><li>1) Pregnant and lactating patients</li><li>2) Patients with hepatic insufficiency</li><li>3) Patients with renal insufficiency</li><li>4) Pediatric patients</li><li>5) Elderly patients</li><li>6) Patients with cardiovascular disease</li><li>7) Patients with gastrointestinal diseases</li></ol>                                                                                                       |
| <i>1.6 When patients use topical NSAIDs, does pharmacist intervention (medication education, consultation, etc.) help improve patient adherence and increase efficacy?</i>                                                                                                                                                                                                                                                                                                                                                                                                              |
| 2 Effectiveness outcomes <ol style="list-style-type: none"><li>2.1 Degree of pain relief</li><li>2.2 WOMAC score</li><li>2.3 NNT</li><li>2.4 Degree of improvement in body function (range of motion)</li><li>2.5 Degree of symptom improvement (swelling)</li><li>2.6 Joint stiffness</li><li>2.7 Quality of life score</li><li>2.8 Treatment satisfaction</li><li>2.9 Restoration of work capacity</li><li>2.10 Proportion of patients with pain relief</li><li>2.11 Incidence of musculoskeletal injury</li><li>2.12 Length of hospital stay</li><li>2.13 Readmission rate</li></ol> |
| 3 Safety outcomes <ol style="list-style-type: none"><li>3.1 Gastrointestinal toxicity</li><li>3.2 Cardiovascular toxicity</li><li>3.3 Skin Toxicity</li><li>3.4 Organ damage</li><li>3.5 Discontinuation rate due to adverse events</li></ol>                                                                                                                                                                                                                                                                                                                                           |
| 4 Medication adherence outcomes <ol style="list-style-type: none"><li>4.1 Medication adherence</li></ol>                                                                                                                                                                                                                                                                                                                                                                                                                                                                                |
| 5 Economic outcomes                                                                                                                                                                                                                                                                                                                                                                                                                                                                                                                                                                     |

- 5.1 Minimum cost
  - 5.2 Cost-effectiveness ratio
  - 5.3 Incremental cost-effectiveness ratio
  - 5.4 Incremental cost-utility ratio
- 

Note: NSAIDs, non-steroidal anti-inflammatory drugs; INR, international normalized ratio; ACEI, angiotensin-converting enzyme inhibitors; ARB, Angiotensin Receptor Blocker; WOMAC, Western Ontario and McMaster Universities Osteoarthritis Index; NNT, number needed to treat.

**Supplemental Table S3.** Risk of bias assessment tools for different types of studies

| Study Type                                                                                                         | Quality Assessment Tool                                                                                                                                                        |
|--------------------------------------------------------------------------------------------------------------------|--------------------------------------------------------------------------------------------------------------------------------------------------------------------------------|
| Clinical practice guidelines (including expert consensus), systematic review, meta-analysis, network meta-analysis | Appraisal of Guidelines for Research & Evaluation Instrument (AGREE II), A Measurement Tool to Assess Systematic Reviews (AMSTAR 2), Risk of Bias in Systematic Review (ROBIS) |
| Randomized controlled trial (RCT)                                                                                  | Cochrane risk of bias tool (ROB)                                                                                                                                               |
| Observation study                                                                                                  | Risk Of Bias In Non-randomised Studies - of Interventions (ROBINS-I)                                                                                                           |
| Pharmacoeconomics study                                                                                            | Consolidated Health Economic Evaluation Reporting Standards, (CHEERS) Statements                                                                                               |
| Case report research                                                                                               | Consensus-based Clinical Case Reporting Guideline (CARE)                                                                                                                       |

**Supplemental Table S4.** GRADE evidence quality grading

| Grade        | Definition                                                                                                                                                                             |
|--------------|----------------------------------------------------------------------------------------------------------------------------------------------------------------------------------------|
| High (A)     | We are very confident that the true effect lies close to that of the estimate of the effect.                                                                                           |
| Moderate (B) | We are moderately confident in the effect estimate: the true effect is likely to be close to the estimate of the effect, but there is a possibility that it is substantially different |
| Low (C)      | Our confidence in the effect estimate is limited: the true effect may be substantially different from the estimate of the effect.                                                      |
| Very low (D) | We have very little confidence in the effect estimate: the true effect is likely to be substantially different from the estimate of effect                                             |

Note: GRADE, grading of recommendations assessment, development and evaluation.

**Supplemental Table S5.** Characteristics of marketed topical NSAIDs

| Formulation | Generic Name               | Trade Name                           | Specification                              | Dosage                                                                                                                                                            |
|-------------|----------------------------|--------------------------------------|--------------------------------------------|-------------------------------------------------------------------------------------------------------------------------------------------------------------------|
| Plaster     | Ibuprofen                  | Nurofen 24-Stunden<br>Schmerzplaster | 200 mg                                     | 1 patch each time, once a day                                                                                                                                     |
|             | Diclofenac<br>Sodium       | Voltarol 140 mg Medicated<br>Plaster | 140 mg                                     | 1 patch each time, once in the morning and evening, the maximum daily dose is 2 patches                                                                           |
|             | Piroxicam                  | Feldene Gel                          | 0.50%                                      | Apply 1g (about 3 cm or 1/4 inch) to the affected area each time, 3 to 4 times a day                                                                              |
| Gel         | Ibuprofen                  | Ibugel                               | 5%                                         | Apply appropriate amount to the affected are                                                                                                                      |
|             | Ibuprofen                  | Ibugel Forte                         | 10%                                        | Apply 2-5 cm (50-125 mg ibuprofen) to the affected area each time, up to 3 times a day                                                                            |
|             | Ibuprofen                  | Burana                               | 5%                                         | Apply 4-10 cm (100-250 mg ibuprofen) to the affected area each time, up to 3 times a day, the maximum daily dose is 15 g gel, equivalent to 750 mg ibuprofe       |
|             | Ibuprofen-<br>peppermint   | Duo-Kraft                            | Ibuprofen 5.0% w/w;<br>L- Menthol 3.0% w/w | 1-4 cm each time, apply to the affected area, 2-3 times a day, and the interval between each application should not be less than 4 hours                          |
|             | loxoprofen<br>sodium       | Loxonin Gel                          | 1%                                         | Apply appropriate amount to the affected area, several times a day                                                                                                |
|             | Niflumic Acid              | Niflugel                             | 2.5%                                       | 2.5 cm (1g) each time, 2 to 4 times a day                                                                                                                         |
|             | Diclofenac<br>diethylamine | Diclofenac Sigillata<br>Schmerzgel   | 20mg/g                                     | 1-4 g gel (equivalent to cherry to walnut size, 20-80 mg diclofenac sodium) each time, the maximum daily dose is 8 g gel (equivalent to 160 mg diclofenac sodium) |
|             | Diclofenac                 | Voltaren                             | 200mg/20g                                  | Apply an appropriate amount according to the size of the sore                                                                                                     |

|               |                   |                               |                      |                                                                                                                                                                                                                                                                                                         |
|---------------|-------------------|-------------------------------|----------------------|---------------------------------------------------------------------------------------------------------------------------------------------------------------------------------------------------------------------------------------------------------------------------------------------------------|
|               | diethylamine      |                               |                      | area, and rub gently to make the product penetrate the skin, 3 to 4 times a day                                                                                                                                                                                                                         |
|               | Diclofenac Sodium | Voltaren Gel                  | 1%                   | Lower limbs: each joint 4 g, 4 times a day, any single joint of the lower limbs should not exceed 16g/day; upper limbs: each joint 2 g, 4 times a day, the dosage of any single joint of the upper limbs should not exceed 8 g/day; daily maximum dose: not to exceed 32 g daily in all affected joints |
|               | Ketoprofen        | Oauvail Gel/Sector Gel Fastum | 2.5%                 | 2-4 g (5-10 cm) each time, 2-4 times a day, usually the maximum dose is 15g per day                                                                                                                                                                                                                     |
|               | Indomethacin      | IDOMETHINE KOWA GEL           | 1%                   | Apply appropriate amount to the affected area, several times a day                                                                                                                                                                                                                                      |
|               | Felbinac          | 通尔其                           | 10g; 0.3g; 20g; 0.6g | 1g each time, 2 to 4 times a day. If there are multiple damages, the total amount per day should not exceed 25g (equivalent to 25 times)                                                                                                                                                                |
| Cataplasms    | Flurbiprofen      | Zepolas Pap                   | 40, 80 mg            | 2 times a day, apply to the affected area                                                                                                                                                                                                                                                               |
|               | loxoprofen sodium | Loxoprofen Na Pap             | 100, 200 mg          | One time a day, apply to the affected area                                                                                                                                                                                                                                                              |
|               | Ketoprofen        | Mohrus Pap                    | 30 mg, 60 mg         | 2 times a day, apply to the affected area                                                                                                                                                                                                                                                               |
|               | Ketoprofen        | Mohrus Pap                    | 120, 240mg           | One time a day, apply to the affected area                                                                                                                                                                                                                                                              |
|               | Indomethacin      | Catlep, KOWA                  | 35, 70mg             | 1-2 times a day, apply to the affected area                                                                                                                                                                                                                                                             |
| Foaming agent | Ibuprofen         | Ibumousse                     | 5% w/w               | 1-2 g each time (1-2 golf ball size), 3-4 times a day                                                                                                                                                                                                                                                   |
|               | Felbinac          | Traxam                        | 3.17% w/w            | 4 cm each time (1g, the size of a golf ball), 2 to 4 times a day, the total daily dose should not exceed 25g                                                                                                                                                                                            |
| Spray         | Ibuprofen         | Buleve Pain Relief 5% Spray   | 5%                   | 5-10 presses (1-2ml) each time, 3-4 times a day, with an interval of at least 4 hours between administrations, and no more than 40 presses (8ml) within 24 hours                                                                                                                                        |

|          |                   |                                    |            |                                                                                                                                                                                                            |
|----------|-------------------|------------------------------------|------------|------------------------------------------------------------------------------------------------------------------------------------------------------------------------------------------------------------|
|          | loxoprofen sodium | Loxoprofen Na Spray                | 1%         | Spray an appropriate amount on the affected area several times a day                                                                                                                                       |
|          | Diclofenac Sodium | Voltarol®Active 4% Cutaneous Spray | 4%         | 4-5 presses each time (0.8-1.0 g contains 32-40 mg diclofenac sodium), the maximum single dose is 1.0g three times a day, and the maximum daily dose is 15 presses (3.0g contains 120mg diclofenac sodium) |
|          | Diclofenac Sodium | Difene Spray Gel                   | 4%         | 4-5 presses each time, the maximum single dose is 5 presses 3 times a day, and the maximum daily dose is 15 presses                                                                                        |
| Aerosol  | Diclofenac Sodium | 劲通, 好德快                            | 1.25%      | Spray on the affected area, the time of spraying should not exceed 2 seconds (spray about 25mg), 3 times a day, the total daily dosage should not exceed 150mg                                             |
|          | Diclofenac Sodium | Pennsaid                           | 2% w/w     | 2 presses (40 mg) on each knee, 2 times a day                                                                                                                                                              |
|          | Diclofenac Sodium | DICLOFENAC SODIUM 1.5%             | 1.5% w/w   | 40 drops/time on each knee, 4 times a day                                                                                                                                                                  |
| Solution | Ketoprofen        | Sector Lotion                      | 3%         | Apply appropriate amount to the affected area, several times a day                                                                                                                                         |
|          | Indomethacin      | Inteban                            | 1%, 1.5%   | Apply appropriate amount to the affected area, 2-3 times a day                                                                                                                                             |
|          | Felbinac          | 全力                                 | 10ml: 0.3g | 1 mL each time, 2 to 4 times a day. If there are multiple damages, the total amount of this product should not exceed 25g per day (equivalent to 25 times)                                                 |
|          | Ibuprofen         | Vesicum                            | 5%         | 50-125 mg each time (4-10 cm), 3-4 times a day                                                                                                                                                             |
| Cream    | Ketoprofen        | Sector Cream                       | 3%         | Apply appropriate amount to the affected area, several times a day                                                                                                                                         |
|          | Indomethacin      | KOWA                               | 1%         | Apply appropriate amount to the affected area, several times a day                                                                                                                                         |

|          |                   |             |           |                                                                                                                        |
|----------|-------------------|-------------|-----------|------------------------------------------------------------------------------------------------------------------------|
| Ointment | Piroxicam         | Baxo        | 0.50%     | Apply appropriate amount to the affected area, several times a day                                                     |
|          | Indomethacin      | Inteban     | 1%        | Apply appropriate amount to the affected area, several times a day                                                     |
| Patch    | Piroxicam         | 亮克          | 14mg      | Stick on the affected area, 1 patch each time, once a day                                                              |
|          | Piroxicam         | Trast       | 48mg      | Stick on the affected area, 1 patch each time, once every 2 days.<br>1 patch daily when bathing, showering or sweating |
|          | Flurbiprofen      | Zepolas     | 20, 40mg  | 2 times a day, apply to the affected area                                                                              |
|          | loxoprofen sodium | Loxonin     | 50, 100mg | 1 time a day, apply to the affected area                                                                               |
|          | Diclofenac        | Flector     | 1.30%     | 1 patch (180 mg) each time, 2 times a day                                                                              |
|          | Eporamide         |             |           |                                                                                                                        |
|          | Ketoprofen        | Mohrus Tape | 20, 40mg  | 1 time a day, apply to the affected area                                                                               |
|          | Indomethacin      | Catlep      | 35mg      | 2 times a day, apply to the affected area                                                                              |



**Supplemental Table S6.** Comparison of the efficacy and adverse reactions of topical NSAIDs and placebo in the treatment of acute musculoskeletal pain –Evidence Summary

| Outcomes             | Anticipated absolute effects* (95% CI) |                   | Relative effect<br>(95% CI) | Number of<br>participants (studies) | Certainty of the evidence<br>(GRADE) |
|----------------------|----------------------------------------|-------------------|-----------------------------|-------------------------------------|--------------------------------------|
|                      | Risk with topical<br>NSAIDs            | Risk with placebo |                             |                                     |                                      |
| Treatment Success    | 660 per 1000                           | 426 per 1000      | 1.55 (1.48, 1.64)           | 5539 (35 trials)                    | High                                 |
| Local adverse events | 25 per 1000                            | 25 per 1000       | 1.01 (0.84, 1.21)           | 7642 (42 trials)                    | High                                 |

Note: \*The risk in the intervention group (and its 95% confidence interval) is based on the assumed risk in the comparison group and the relative effect of the intervention (and its 95% CI). CI: Confidence interval; MD: Mean difference.

**Supplemental Table S7.** Comparison of the efficacy and adverse reactions of topical NSAIDs and placebo in the treatment of chronic musculoskeletal pain - Evidence Summary

| Outcomes                                 | Anticipated absolute effects* (95% CI) |                   | Relative effect (95% CI) | Number of participants (studies) | Certainty of the evidence (GRADE) |
|------------------------------------------|----------------------------------------|-------------------|--------------------------|----------------------------------|-----------------------------------|
|                                          | Risk with topical NSAIDs               | Risk with placebo |                          |                                  |                                   |
| Treatment Success                        |                                        |                   |                          |                                  |                                   |
| Diclofenac ( > 6weeks)                   | 547 per 1000                           | 456 per 1000      | 1.20 (1.12, 1.29)        | 2343 (5 trials)                  | MODERATE                          |
| Ketoprofen                               | 497 per 1000                           | 456 per 1000      | 1.09 (1.01, 1.17)        | 2573 (4 trials)                  | MODERATE                          |
| Local adverse events                     |                                        |                   |                          |                                  |                                   |
| Diclofenac                               | 129 per 1000                           | 114 per 1000      | 1.13 (1.00, 1.29)        | 4452 (18 trials)                 | MODERATE                          |
| Ketoprofen                               | 118 per 1000                           | 114 per 1000      | 1.04 (0.85, 1.27)        | 2621 (4 trials)                  | MODERATE                          |
| Gastrointestinal adverse events          |                                        |                   |                          |                                  |                                   |
| Diclofenac                               | 42 per 1000                            | 37 per 1000       | 1.13 (0.82, 1.55)        | 3398 (14 trials)                 | MODERATE                          |
| Ketoprofen                               | 36 per 1000                            | 37 per 1000       | 0.96 (0.69, 1.32)        | 2621 (4 trials)                  | MODERATE                          |
| Discontinuation due to adverse reactions |                                        |                   |                          |                                  |                                   |
| Diclofenac                               | 47 per 1000                            | 32 per 1000       | 1.46 (1.10, 1.94)        | 4117 (17 trials)                 | MODERATE                          |

| Outcomes   | Anticipated absolute effects* (95% CI) |                   | Relative effect (95% CI) | Number of participants (studies) | Certainty of the evidence (GRADE) |
|------------|----------------------------------------|-------------------|--------------------------|----------------------------------|-----------------------------------|
|            | Risk with topical NSAIDs               | Risk with placebo |                          |                                  |                                   |
| Ketoprofen | 41 per 1000                            | 32 per 1000       | 1.28 (0.92, 1.78)        | 2621 (4 trials)                  | MODERATE                          |

Note: \*The risk in the intervention group (and its 95% confidence interval) is based on the assumed risk in the comparison group and the relative effect of the intervention (and its 95% CI). CI: Confidence interval; MD: Mean difference.

**Supplemental Table S8.** Comparison of the efficacy and safety of topical versus oral NSAIDs for the treatment of chronic musculoskeletal pain - Evidence Summary

| Outcomes                                         | Anticipated absolute effects* (95% CI) |                       | Relative effect (95% CI) | Number of participants (studies) | Certainty of the evidence (GRADE) |
|--------------------------------------------------|----------------------------------------|-----------------------|--------------------------|----------------------------------|-----------------------------------|
|                                                  | Risk with topical NSAIDs               | Risk with oral NSAIDs |                          |                                  |                                   |
| Treatment success                                | 607 per 1000                           | 583 per 1000          | 1.04 (0.97, 1.12)        | 2197 (9 trials)                  | MODERATE                          |
| Local adverse events                             | 114 per 1000                           | 34 per 1000           | 3.36 (2.53, 4.45)        | 2120 (9 trials)                  | MODERATE                          |
| Gastrointestinal adverse events                  | 89 per 1000                            | 135 per 1000          | 0.66 (0.56, 0.77)        | 2430 (10 trials)                 | MODERATE                          |
| Drug discontinuation due to adverse events       | 40 per 1000                            | 47 per 1000           | 0.84 (0.68, 1.05)        | 2431 (10 trials)                 | MODERATE                          |
| Drug discontinuation due to suboptimal treatment | 64 per 1000                            | 32 per 1000           | 1.98 (1.25, 3.12)        | 1667 (7 trials)                  | MODERATE                          |

Note: \*The risk in the intervention group (and its 95% confidence interval) is based on the assumed risk in the comparison group and the relative effect of the intervention (and its 95% CI). CI: Confidence interval; MD: Mean difference.

**Supplemental Table S9.** Comparison of the efficacy of topical NSAIDs with different components for musculoskeletal pain - Evidence Summary

| NSAIDs       | Number of studies | Number of study participants | Effect estimates<br>Relative Risk (95% CI) | NNT (95% CI)       | Evidence quality (GRADE) |
|--------------|-------------------|------------------------------|--------------------------------------------|--------------------|--------------------------|
| Diclofenac   | 13                | 2964                         | 1.55 (1.44, 1.66)                          | 4.27 (3.56, 5.33)  | Moderate <sup>a</sup>    |
| Ibuprofen    | 7                 | 698                          | 1.84 (1.58, 2.14)                          | 2.79 (2.06, 4.05)  | Moderate <sup>a</sup>    |
| Ketoprofen   | 7                 | 683                          | 1.56 (1.37, 1.77)                          | 4.19 (3.05, 6.34)  | Moderate <sup>a</sup>    |
| Piroxicam    | 4                 | 504                          | 1.48 (1.27, 1.73)                          | 4.89 (3.22, 8.69)  | Moderate <sup>a</sup>    |
| Indomethacin | 3                 | 341                          | 1.26 (1.03, 1.55)                          | 9.03 (4.27, 78.25) | Low <sup>a, b</sup>      |
| Benzydamine  | 3                 | 193                          | 1.15 (0.96, 1.38)                          | 15.65 (6.18, -)    | Low <sup>a, b</sup>      |
| Etofenamate  | 1                 | 156                          | 6.83 (3.08, 15.16)                         | 0.40 (0.17, 1.13)  | Low <sup>b, c</sup>      |

Note: NSAIDs, nonsteroidal anti-inflammatory drugs; CI, confidence interval; NNT, number needed to treat; GRADE, grading of recommendations assessment, development and evaluation. a. risk of bias; b. imprecision; c. indirectness.

**Supplemental Table S10.** Comparison of the efficacy and safety of different topical NSAIDs for the treatment of hip/knee arthritis

| Topical NSAIDs              | Effect Size for Pain Relief<br>(95% CI) | Probability of achieving minimal clinically<br>meaningful difference | Odds ratio for<br>dropout due to<br>adverse events (95%<br>CI) |
|-----------------------------|-----------------------------------------|----------------------------------------------------------------------|----------------------------------------------------------------|
| Diclofenac (70-81 mg)       | −0.54 (−0.77, −0.31)                    | 92.3                                                                 | 1.14 (0.74, 1.72)                                              |
| Diclofenac (140-160 mg)     | −0.61 (−0.87, −0.35)                    | 96.3                                                                 | 1.58 (0.77, 3.34)                                              |
| Flurbiprofen patch (≤20 mg) | −0.25 (−0.92, 0.42)                     | 36.2                                                                 | 0.40 (0.03, 4.14)                                              |
| Flurbiprofen patch (40 mg)  | −0.41 (−1.20, 0.37)                     | 53.9                                                                 | 0.32 (0.01, 3.82)                                              |
| Ibuprofen (1500 mg)         | −0.19 (−1.03, 0.66)                     | 33.7                                                                 | —                                                              |
| Ketoprofen (50 mg)          | −0.15 (−0.64, 0.33)                     | 18.7                                                                 | 0.67 (0.25, 1.65)                                              |
| Ketoprofen (100 mg)         | −0.22 (−0.49, 0.06)                     | 14.1                                                                 | 0.99 (0.44, 2.15)                                              |
| Ketoprofen (200-220 mg)     | −0.23 (−0.39, −0.06)                    | 4.4                                                                  | 1.27 (0.79, 2.02)                                              |
| Piroxicam (15 mg)           | 0.39 (−0.49, 1.25)                      | 4.3                                                                  | 1.32 (0.31, 5.74)                                              |

Note: CI, confidence interval; NSAIDs, nonsteroidal anti-inflammatory drugs.

**Supplemental Table S11.** Evaluation of drug interactions between topical NSAIDs and other drugs - Evidence Summary

| Outcomes                  | Anticipated absolute effects* (95% CI)                                                                                                                                                                            |                                                                                                                                                                   | Relative effect (95% CI) | Number of participants (studies)     | Certainty of the evidence (GRADE) | Comments                                                                                                                                   |
|---------------------------|-------------------------------------------------------------------------------------------------------------------------------------------------------------------------------------------------------------------|-------------------------------------------------------------------------------------------------------------------------------------------------------------------|--------------------------|--------------------------------------|-----------------------------------|--------------------------------------------------------------------------------------------------------------------------------------------|
|                           | Risk with potential drug-drug interaction                                                                                                                                                                         | Risk with no potential drug-drug interaction                                                                                                                      |                          |                                      |                                   |                                                                                                                                            |
| Potential of warfarin     | 5 cases                                                                                                                                                                                                           | -                                                                                                                                                                 | -                        | 12<br>(1 case series, 1 case report) | Very low                          | Only 1 trial, small sample size; very serious risk of bias due to lack of control, very serious imprecision, and very serious indirectness |
| Risk of Adverse Reactions | At least one AE was experienced by 62.6% (107/171) of patients with at least 1 drug-drug interaction risk<br>Gastrointestinal: 5.3% (9/171)<br>Cardiovascular: 4.7% (8/171)<br>Renal: 1.2% (2/171)<br>Hepatic: 0% | At least one AE was experienced by 55.4% (46/83) of patients<br>Gastrointestinal: 7.2% (6/83)<br>Cardiovascular: 1.2% (1/83)<br>Renal: 0%<br>Hepatic: 1.2% (1/83) |                          | 254 (1 trial)                        | Low                               | Only 1 study, small sample size; imprecision and indirectness                                                                              |

Note: \*The risk in the intervention group (and its 95% confidence interval) is based on the assumed risk in the comparison group and the relative effect of the intervention (and its 95% CI). CI: Confidence interval; MD: Mean difference.

**Supplemental Table S12.** Safety of Topical NSAIDs in Special Populations - Evidence Summary

| Outcomes               | Anticipated absolute effects* (95% CI)                                           |                                           | Relative effect (95% CI) | Number of participants (studies) | Certainty of the evidence (GRADE) | Comments                                                      |
|------------------------|----------------------------------------------------------------------------------|-------------------------------------------|--------------------------|----------------------------------|-----------------------------------|---------------------------------------------------------------|
|                        | Risk with topical NSAIDs                                                         | Risk with placebo                         |                          |                                  |                                   |                                                               |
| Children               |                                                                                  |                                           |                          |                                  |                                   |                                                               |
| Pain relief            | 2.5% Ketoprofen gel: 20 (13–28) at 15 min<br>35 (29–41) at 30 min                | 5 (4–10) at 15 min;<br>9 (6–16) at 30 min | -                        | 112 (1 trial)                    | Low                               | Only 1 trial, small sample size; imprecision and indirectness |
| Adverse events         | 0                                                                                | 0                                         | Not estimable            | 112 (1 trial)                    | -                                 | -                                                             |
| Risk of adverse events | Adverse events: 14/104<br>Possibly treatment-related events: 9/104<br>Serious: 0 |                                           |                          | 104<br>(1 non randomized study)  | Low                               | Only 1 study, small sample size; imprecision and indirectness |

Older adults



| Outcomes                                    | Anticipated absolute effects* (95% CI) |                   | Relative effect (95% CI) | Number of participants (studies) | Certainty of the evidence (GRADE) | Comments                                                                                                              |
|---------------------------------------------|----------------------------------------|-------------------|--------------------------|----------------------------------|-----------------------------------|-----------------------------------------------------------------------------------------------------------------------|
|                                             | Risk with topical NSAIDs               | Risk with placebo |                          |                                  |                                   |                                                                                                                       |
| Risk of treatment-related adverse reactions | 120 per 1000                           | 42 per 1000       | 2.89 (1.49, 5.60)        | 538 (5 trials)                   | Low                               | Small sample size and number of events; imprecision and indirectness (Diclofenac for knee and hip osteoporosis)       |
| Local adverse reactions                     | 578 per 1000                           | 77 per 1000       | 7.51 (3.17, 17.78)       | 715 (6 trials)                   | Low                               | Small sample size and number of events; imprecision and indirectness (Diclofenac for hand, knee and hip osteoporosis) |
| Discontinuation due to adverse reactions    | 58 per 1000                            | 8 per 1000        | 7.71 (1.79, 33.20)       | 538 (5 trials)                   | Low                               | Small sample size and number of events; imprecision and indirectness (Diclofenac for knee and hip osteoporosis)       |
| Gastrointestinal adverse reaction           | 174 per 1000                           | 179 per 1000      | 0.97 (0.46, 2.02)        | 715 (6 trials)                   | Low                               | Small sample size and number of events; imprecision and indirectness (Diclofenac for hand, knee and hip osteoporosis) |

| Outcomes                        | Anticipated absolute effects* (95% CI) |                   | Relative effect (95% CI) | Number of participants (studies) | Certainty of the evidence (GRADE) | Comments                                                                                                                     |
|---------------------------------|----------------------------------------|-------------------|--------------------------|----------------------------------|-----------------------------------|------------------------------------------------------------------------------------------------------------------------------|
|                                 | Risk with topical NSAIDs               | Risk with placebo |                          |                                  |                                   |                                                                                                                              |
| Cardiovascular adverse reaction | 4 per 1000                             | 0                 | 2.89 (0.12, 70.65)       | 538 (5 trials)                   | Very low                          | Small sample size and number of events; very serious imprecision and indirectness (Diclofenac for knee and hip osteoporosis) |

Note: \*The risk in the intervention group (and its 95% confidence interval) is based on the assumed risk in the comparison group and the relative effect of the intervention (and its 95% CI). CI: Confidence interval; MD: Mean difference.

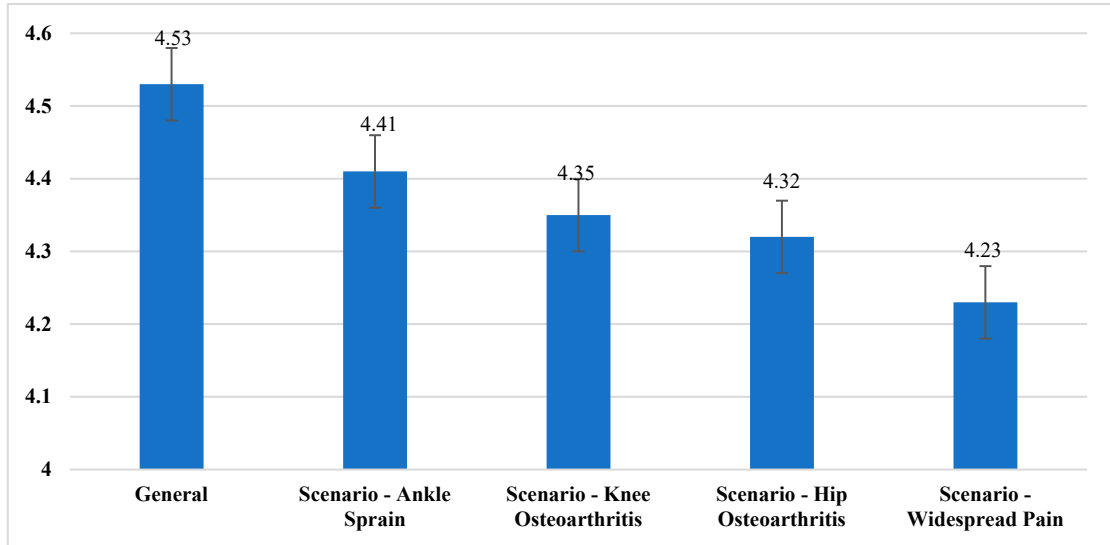

**Supplemental Figure S1** Willingness of patients with musculoskeletal pain to accept the use of topical NSAIDs in different scenarios. Note: The degree of patient willingness was assigned using a scale of 1 to 5: very willing = 5, more willing = 4, neutral = 3, less willing = 2, not at all willing = 1.

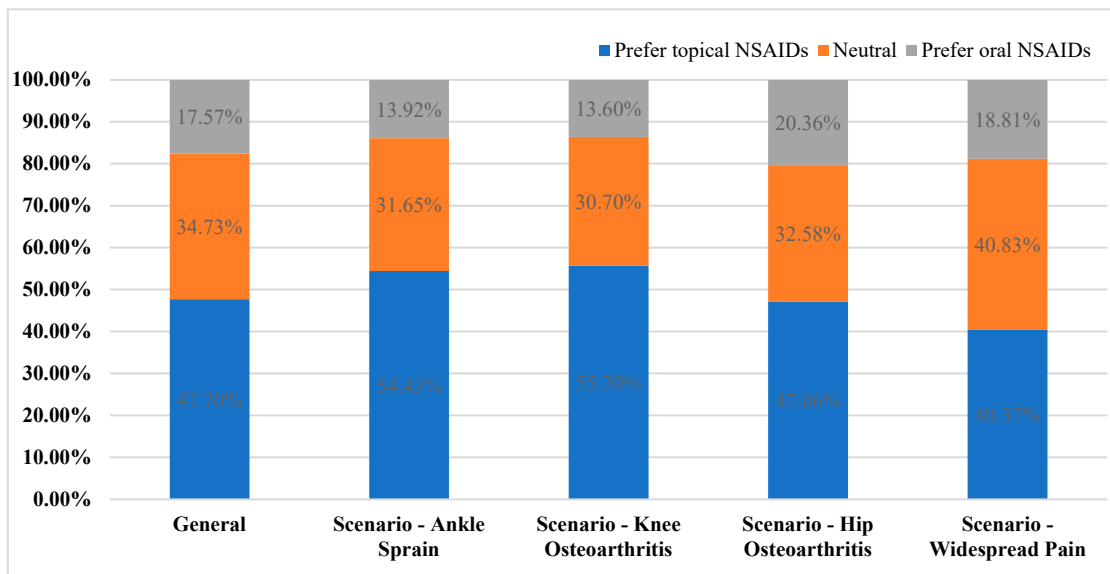

**Supplemental Figure S2** Preferences for topical and oral NSAIDs in musculoskeletal pain patients in different contexts. Note: The patient's preference for "topical and oral NSAIDs" was calculated as the topical NSAIDs score - oral NSAIDs score (the result range is - 4 to 4). The larger the value, the more likely the patient is to choose topical NSAIDs, otherwise, the more likely the patient is to choose oral NSAIDs, and 0 means neutral.

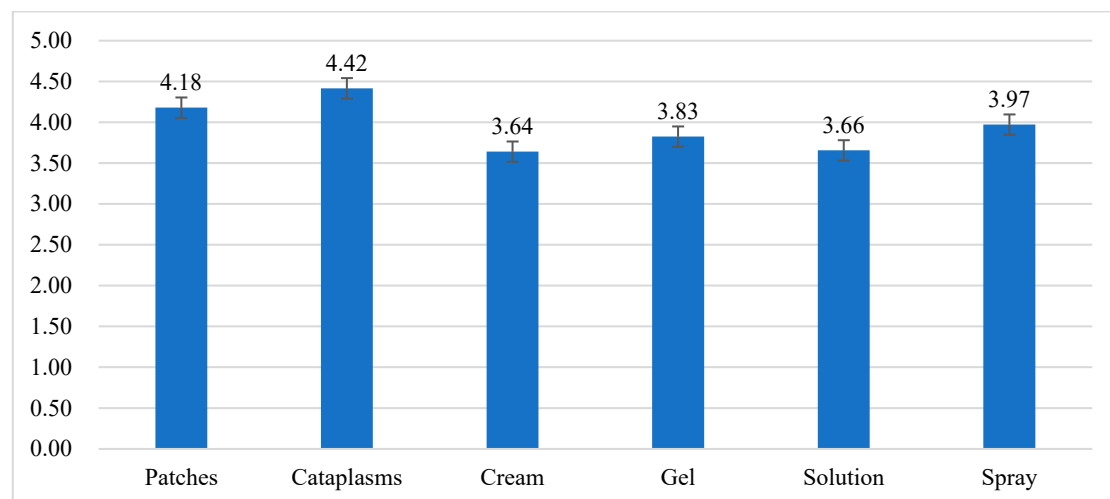

**Supplemental Figure S3** Preferences for topical NSAIDs of different dosage in musculoskeletal pain patients. Note: The degree of patient willingness was assigned using a scale of 1 to 5: very willing = 5, more willing = 4, neutral = 3, less willing = 2, not at all willing = 1.
